# Supplementary material for: Migration paths of the Na+-ion diffusion for minerals of the lovozerite group: crystallochemical and DFT modeling
Source: Royal Society of Chemistry journal article supplement (doi:10.1039/d4ce00545g), 2024-01-01

## Supplementary materials

### Migration paths of the Na<sup>+</sup>-ion diffusion for minerals of the lovozerite group: crystallochemical and DFT modeling

Natalia A. Kabanova<sup>1</sup>

<sup>1</sup>Laboratory of Nature-Inspired Technologies and Environmental Safety of the Arctic, Kola Science

Centre, Russian Academy of Sciences, Fersmana str. 14, 184209 Apatity, Russia;

<sup>2</sup>Samara State Technical University, Molodogvardeyskaya Str. 244, Samara, Russia

**Table S1.** Topological characteristics of the atomic nets for lovozerite group of minerals.

| Mineral                                                             | Space group                                                 | Topological classification | Type of atoms coordination                            | Point symbol                                                                                                                                       |              | Transitivity  | Tiling                                                                                                                                                            | ICSD                                        |
|---------------------------------------------------------------------|-------------------------------------------------------------|----------------------------|-------------------------------------------------------|----------------------------------------------------------------------------------------------------------------------------------------------------|--------------|---------------|-------------------------------------------------------------------------------------------------------------------------------------------------------------------|---------------------------------------------|
| Combeite<br>Litvinskite<br>Lovozerite<br>Townendite<br>Zolotarevite | $R\bar{3}m$<br>$Cm$<br>$C2_1$<br>$R\bar{3}m$<br>$R\bar{3}m$ | sqc962                     | 3,6-c                                                 | $\{6^3\}6\{6^6.8^6.12^3\}$                                                                                                                         | 2-nodal net  | [4 2 3 1]     | $[6^4.8^3]$                                                                                                                                                       | 62827<br>57042<br>30389<br>168092<br>137779 |
| Kapustinite<br>Kazakovite<br>Zirsinalite                            | $R\bar{3}m$<br>$C2/m$<br>$R\bar{3}cr$                       | New topology               | 3,4,6 <sup>2</sup> -c net                             | $\{4.8^2\}2\{4^3.8^3\}2\{4^6.8^6.10^3\}$                                                                                                           | 4-nodal net  | [10 10 9 8]   | 2t-kzd + 6t-jnt-1 +<br>3t-kds+t-cub+3t-ste                                                                                                                        | 250170<br>200602<br>200800                  |
| Imandrite                                                           | $Pmnn$                                                      | New topology               | 3 <sup>2</sup> ,4 <sup>2</sup> ,6 <sup>2</sup> -c net | $\{4.5.7\}2\{4.5^2.6^2.8\}2\{4.5^2.7^2.8\}$<br>$4\{4.7.8\}4\{4^4.5^2.6^2.7^4.8^2.9\}$<br>$2\{4^6.7^2.8^4.9^2.10\}$                                 | 6-nodal net  | [9 10 9 7]    | 2t-kzd + 2t-ukc +<br>4t-jnt-1 +<br>t-lov + 4[4.5.7.8 <sup>2</sup> ]<br>+ t-bru + t-ste                                                                            | 200805                                      |
| Tisinalite                                                          | $P\bar{3}$                                                  | New topology               | 3,4,6-c net                                           | $\{4.5.7\}2\{4.5^2.6^2.8\}2\{4.5^2.7^2.8\}$<br>$4\{4.7.8\}4\{4^4.5^2.6^2.7^4.8^2.9\}$<br>$2\{4^6.7^2.8^4.9^2.10\}$                                 | 6-nodal net  | [10 9 8 7]    | 3t-kds +<br>t-cub+2[6 <sup>3</sup> .8 <sup>3</sup> ]                                                                                                              | 250068                                      |
| Koashvite                                                           | $Pmnb$                                                      | New topology               | 3 <sup>4</sup> ,4 <sup>4</sup> ,6 <sup>3</sup> -c net | $\{4.5.7\}\{4.5^2.7^2.8\}\{4.7.8\}$<br>$5\{4^2.5.7.8^2\}4\{4^3.7^2.8\}$<br>$\{4^4.5^2.7^6.8^2.10\}\{4^6.7^2.8^4.9^2.10\}$<br>$\{4^6.7^2.8^4.9^3\}$ | 11-nodal net | [16 19 16 10] | 2t-kzd + 4t-jnt-1<br>+[4 <sup>2</sup> .7 <sup>2</sup> ]+t-kds +<br>2[4.5.7.8 <sup>2</sup> ]+ t-csv-1<br>+ t-ste+[4 <sup>2</sup> .7 <sup>4</sup> .8 <sup>2</sup> ] | 86517                                       |

**Table S2.** Tiles for atomic net of the combeite, litvinskite, lovozerite, townendite, zolotarevite minerals with **sqc962** topology.

| <b>sqc962 (Combeite, Lovozerite, Litvinskite, Townendite, Zolotarevite)</b> |                                                                                                                                     |
|-----------------------------------------------------------------------------|-------------------------------------------------------------------------------------------------------------------------------------|
| <b>Face symbol:</b>                                                         | <b>[6<sup>4</sup>.8<sup>3</sup>]</b>                                                                                                |
|                                                                             | 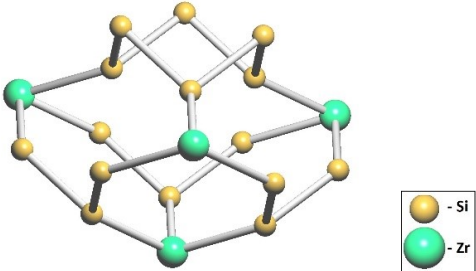                                                   |
| <b>V, E, F:</b>                                                             | <b>(19, 24, 7)</b>                                                                                                                  |
| <b>Label:</b>                                                               | <b>t-unknown</b>                                                                                                                    |
|                                                                             | <p style="text-align: center;"><b>TILING</b></p>  |

**Table S3.** Tiles for atomic net of the tisinallite mineral with new topology obtained by means the geometrically-topological analysis.

| <b>3,4,6-c net New topology (Tisinallite)</b> |                                                                                     |                                                                                     |                                                                                                                                       |
|-----------------------------------------------|-------------------------------------------------------------------------------------|-------------------------------------------------------------------------------------|---------------------------------------------------------------------------------------------------------------------------------------|
| <b>Face symbol:</b>                           | <b>[4<sup>6</sup>]</b>                                                              | <b>[4<sup>2</sup>.8<sup>2</sup>]</b>                                                | <b>[6<sup>3</sup>.8<sup>3</sup>]</b>                                                                                                  |
|                                               | 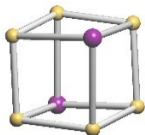 |  |                                                   |
| <b>V, E, F:</b>                               | <b>(8, 12, 6)</b>                                                                   | <b>(10, 12, 4)</b>                                                                  | <b>(17, 21, 6)</b>                                                                                                                    |
| <b>Label:</b>                                 | <b>t-cub</b>                                                                        | <b>t-kds</b>                                                                        | <b>t-unknown1</b>                                                                                                                     |
|                                               |                                                                                     |                                                                                     | <p style="text-align: center;"><b>TILING</b></p>  |

**Table S4.** Tiles for atomic net of the kapustinite, kazakovite, zirsinalite minerals with new topology obtained by means the geometrically-topological analysis.

| <b>3,4,6<sup>2</sup>-c net New topology (Kapustinite, Kazakovite, Zirsinalite)</b>   |                                                                                                    |                                                                                                                                                                                                                                                                                                                                                                                                                                                                        |                                                                                                  |
|--------------------------------------------------------------------------------------|----------------------------------------------------------------------------------------------------|------------------------------------------------------------------------------------------------------------------------------------------------------------------------------------------------------------------------------------------------------------------------------------------------------------------------------------------------------------------------------------------------------------------------------------------------------------------------|--------------------------------------------------------------------------------------------------|
| <b>Face symbol:</b>                                                                  | <b>[4<sup>3</sup>]</b>                                                                             | <b>[4<sup>6</sup>]</b>                                                                                                                                                                                                                                                                                                                                                                                                                                                 | <b>[4<sup>2</sup>.8<sup>2</sup>]</b>                                                             |
|                                                                                      | 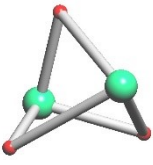                  |                                                                                                                                                                                                                                                                                                                                                                                       |               |
| <b>V, E, F:</b>                                                                      | <b>(5, 6, 3)</b>                                                                                   | <b>(8, 12, 6)</b>                                                                                                                                                                                                                                                                                                                                                                                                                                                      | <b>(10, 12, 4)</b>                                                                               |
| <b>Label:</b>                                                                        | <b>t-kzd</b>      | <b>t-cub</b>                                                                                                                                                                                                                                                                                                                                                                         | <b>t-kds</b>  |
| <b>Face symbol:</b>                                                                  | <b>[8<sup>3</sup>]</b>                                                                             | <b>[4<sup>2</sup>.8<sup>4</sup>]</b>                                                                                                                                                                                                                                                                                                                                                                                                                                   |                                                                                                  |
|                                                                                      |                   |  <div style="display: inline-block; vertical-align: middle; margin-left: 10px;">  - O<br/>  - Si<br/>  - Zr         </div> |                                                                                                  |
| <b>V, E, F:</b>                                                                      | <b>(11, 12, 3)</b>                                                                                 | <b>(16, 20, 6)</b>                                                                                                                                                                                                                                                                                                                                                                                                                                                     |                                                                                                  |
| <b>Label:</b>                                                                        | <b>t-jnt-1</b>  | <b>t-ste</b>                                                                                                                                                                                                                                                                                                                                                                      |                                                                                                  |
| <b>TILING</b>                                                                        |                                                                                                    |                                                                                                                                                                                                                                                                                                                                                                                                                                                                        |                                                                                                  |
|  |                                                                                                    |                                                                                                                                                                                                                                                                                                                                                                                                                                                                        |                                                                                                  |

**Table S5.** Tiles for atomic net of the imandrite mineral with  $3^2,4^2,6^2T18$  topology obtained by means the geometrically-topological analysis.

| <b><math>3^2,4^2,6^2T18</math> (Imandrite)</b>                                       |                                                                                                                             |                                                                                                                          |                                                                                                                          |                                                                                                                        |
|--------------------------------------------------------------------------------------|-----------------------------------------------------------------------------------------------------------------------------|--------------------------------------------------------------------------------------------------------------------------|--------------------------------------------------------------------------------------------------------------------------|------------------------------------------------------------------------------------------------------------------------|
| <b>Face symbol:</b>                                                                  | <b><math>[4^3]</math></b>                                                                                                   | <b><math>[4^2.6^2]</math></b>                                                                                            | <b><math>[6.7^2]</math></b>                                                                                              | <b><math>[4^2.5^4]</math></b>                                                                                          |
|                                                                                      |                                            |                                         |                                        |                                     |
| <b>V, E, F:</b><br><b>Label:</b>                                                     | <b>(5, 6, 3)</b><br><b>t-kzd</b>           | <b>(8, 10, 4)</b><br><b>t-lov</b>       | <b>(9, 10, 3)</b><br><b>t-ukc</b>     | <b>(10, 14, 6)</b><br><b>t-bru</b>  |
| <b>Face symbol:</b>                                                                  | <b><math>[4.5.7.8^2]</math></b>                                                                                             | <b><math>[8^3]</math></b>                                                                                                | <b><math>[4^2.8^4]</math></b>                                                                                            |                                                                                                                        |
|                                                                                      |                                            |                                         |                                      |                                    |
| <b>V, E, F:</b><br><b>Label:</b>                                                     | <b>(13, 16, 5)</b><br><b>t-unknown1</b>  | <b>(11, 12, 3)</b><br><b>t-jnt-1</b>  | <b>(16, 20, 6)</b><br><b>t-ste</b>  |                                                                                                                        |
| <b>TILING</b>                                                                        |                                                                                                                             |                                                                                                                          |                                                                                                                          |                                                                                                                        |
|  |                                                                                                                             |                                                                                                                          |                                                                                                                          |                                                                                                                        |

**Table S6.** Tiles for atomic net of the koashvite mineral with new topology obtained by means the geometrically-topological analysis.

| <b><math>3^4,4^4,6^3</math>-c net New topology (Koashvite)</b> |                                                                                                            |                                                                                                               |                                                                                                          |                                                                                                                 |
|----------------------------------------------------------------|------------------------------------------------------------------------------------------------------------|---------------------------------------------------------------------------------------------------------------|----------------------------------------------------------------------------------------------------------|-----------------------------------------------------------------------------------------------------------------|
| Face symbol:                                                   | $[4^3]$                                                                                                    | $[4^2.7^2]$                                                                                                   | $[4^4.5^2]$                                                                                              | $[4^2.8^2]$                                                                                                     |
|                                                                | 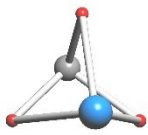                          |                              |                         |                              |
| V, E, F:<br>Label:                                             | (5, 6, 3)<br>t-kzd        | (9, 11, 4)<br>t-unknown1     | (9, 13, 6)<br>t-csv-1   | (10, 12, 4)<br>t-kds         |
| Face symbol:                                                   | $[8^3]$                                                                                                    | $[4.5.7.8^2]$                                                                                                 | $[4^2.8^4]$                                                                                              | $[4^2.7^4.8^2]$                                                                                                 |
|                                                                |                           |                              |                         |                              |
| V, E, F:<br>Label:                                             | (11, 12, 3)<br>t-jnt-1  | (13, 16, 5)<br>t-unknown2  | (16, 20, 6)<br>t-ste  | (20, 26, 8)<br>t-unknown3  |

**TILING**

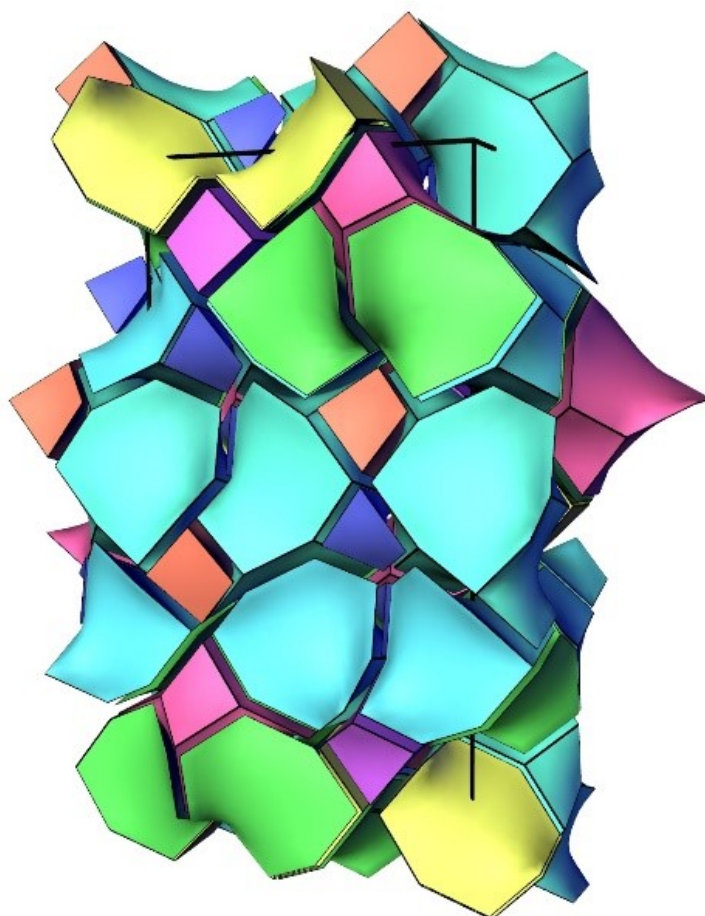

Supplement: d4ce00545g1.pdf [file d4ce00545g1.pdf]
